# Supplementary material
Source: publisher figshare collection journal article supplement (https://acs.figshare.com/ndownloader/files/17991068)
Supplement: Supplementary file 1 [file 17991068]

## **Supporting Information**

### **Multistage polymerization design for g-C<sub>3</sub>N<sub>4</sub> nanosheets with enhanced photocatalytic activity by modifying the polymerization process of melamine**

**Chao Zhang<sup>1</sup>, Jiandong Liu<sup>1</sup>, Xiayun Huang<sup>2</sup>, Daoyong Chen<sup>1, 2\*</sup>, Shiai Xu<sup>1, 3\*</sup>**

<sup>1</sup> *School of Chemical Engineering, Qinghai University, Xining 810016, China*

<sup>2</sup> *The State Key Laboratory of Molecular Engineering of Polymers, Department of Macromolecular Science, Fudan University, Shanghai, 200433, China*

<sup>3</sup> *Shanghai Key Laboratory of Advanced Polymeric Materials, Key Laboratory for Ultrafine Materials of Ministry of Education, School of Materials Science and Engineering, East China University of Science and Technology, Shanghai 200237, China*

---

\* Author to whom correspondence should be addressed.

Electronic mail: [chendy@fudan.edu.cn](mailto:chendy@fudan.edu.cn)(D. Y. Cheng), [saxu@163.com](mailto:saxu@163.com)(S. A. Xu)

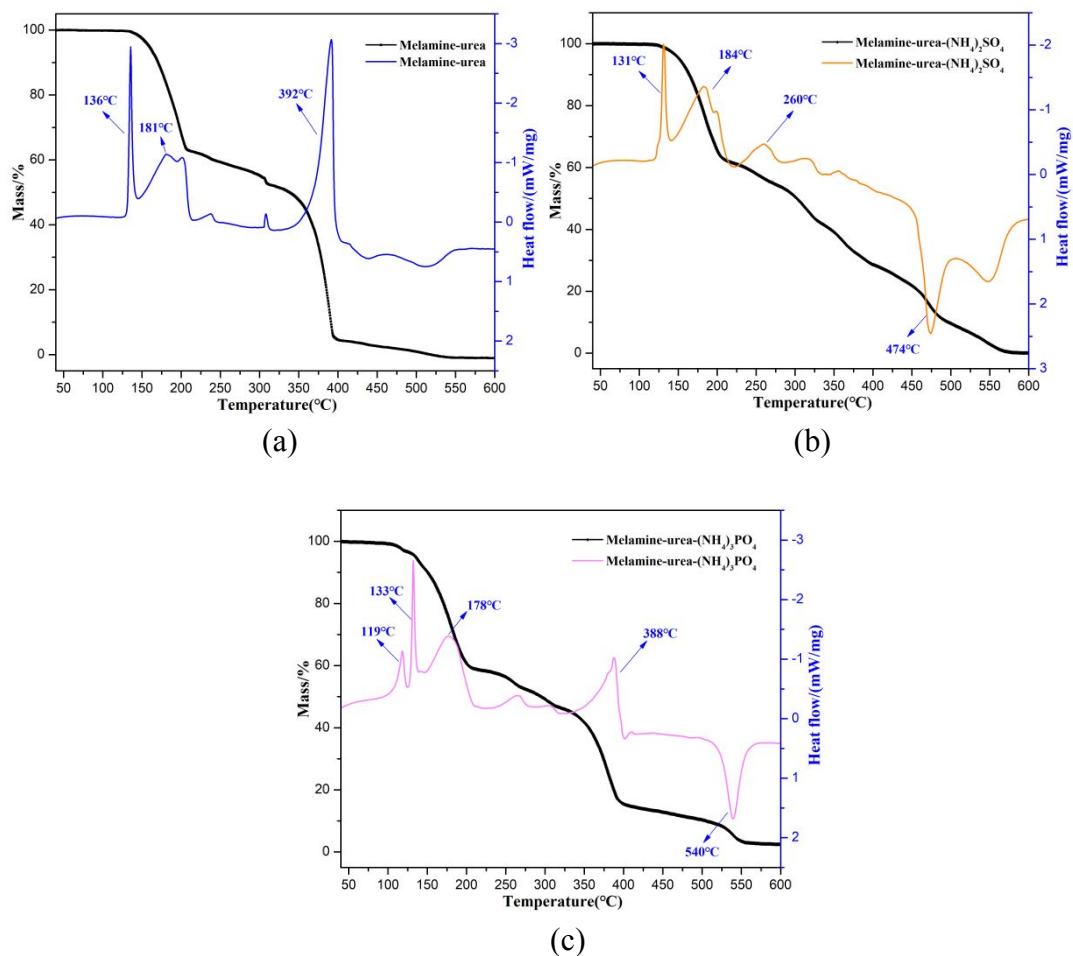

Figure S1. TG-DSC analysis of (a) Melamine-urea, (b) Melamine-urea-(NH<sub>4</sub>)<sub>2</sub>SO<sub>4</sub>, and (c) Melamine-urea-(NH<sub>4</sub>)<sub>3</sub>PO<sub>4</sub>.

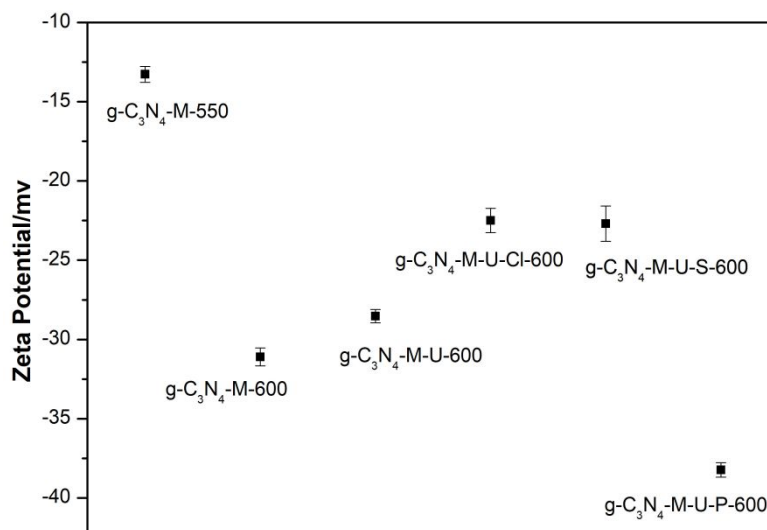

Figure S2. The Zeta potential of the adsorption samples dispersed in deionized water.

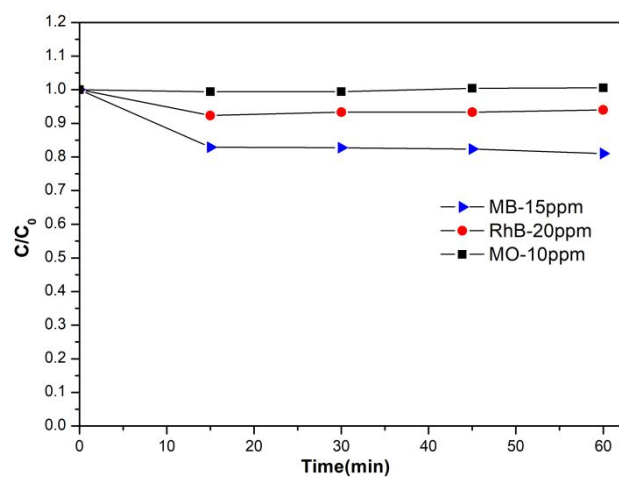

Figure S3. The dye adsorption vs time in the dark condition of g-C<sub>3</sub>N<sub>4</sub>-M-550.
